# Supplementary material for: The Influence of Microaffirmations on Undergraduate Persistence in Science Career Pathways
Source: Atypon-hosted journal article supplement (doi:10.1187/cbe.19-01-0012), 2019-08-23
Supplement: combinedsupmats.pdf [file combinedsupmats.pdf]

# Supplemental Material

*CBE—Life Sciences Education*

Estrada *et al.*

## Supplemental Materials

The Influence of Micro Affirmations on Undergraduate Persistence in Science Career Pathways

Mica Estrada, University of California, San Francisco

Department of Social & Behavioral Sciences, Institute for Health & Aging

3333 California Street, Suite 340, San Francisco, CA 94118

[mica.estrada@ucsf.edu](mailto:mica.estrada@ucsf.edu).

Gerald R. Young, University of California, Berkeley

Jill Nagy, San Francisco State University

Emily Goldstein, University of California, Berkeley

Avi Ben-Zeev, San Francisco State University

Leticia Márquez-Magaña, San Francisco State University

Alegra Eroy-Reveles, University of California, Santa Cruz

## Overview

The following pages include the supplemental tables that were referenced in the main manuscript results sections. Methods, procedures and measures, in addition to approach to analyses, are all described in the main manuscript.

**Table S1:** Means, SD, Skew, and Interitem Correlations among the Items from the Micro Affirmations Scale for Historically Underrepresented Students in Study 1

**Table S2:** Means, SD, Skew, and Interitem Correlations among the Items from the Micro Affirmations Scale for Historically Overrepresented Students in Study 1

**Table S3:** Results of the Mediation Models Examining Whether Scientific Self-Efficacy and Scientific Identity Mediated the Relation between Micro Affirmations and Intentions to Persist in Science-Related Career Pathways Among Historically Underrepresented and Historically Overrepresented Students

**Table S4:** The Micro Affirmations Scale (Omitting Item 5): Two-Factor Model Factor Loadings Observed from the Confirmatory Factor Analyses Conducted in Study 2

**Table S5:** Zero-Order Correlations Among All Psychosocial Variables Across All Students in Study 2

**Table S6:** Zero-Order Correlations Among All Psychosocial Variables Across Historically Underrepresented Students in Study 2

**Table S7:** Zero-Order Correlations Among All Psychosocial Variables Across Historically Overrepresented Students in Study 2

Table S1

*Means, SD, Skew, and Interitem Correlations among the Items from the Micro Affirmations Scale for Historically Underrepresented Students in Study 1 (n = 181)*

| Item # | Mean | SD   | Skew | Kurtosis | Interitem Correlations |      |      |      |      |      |      |
|--------|------|------|------|----------|------------------------|------|------|------|------|------|------|
|        |      |      |      |          | 1                      | 2    | 3    | 4    | 5    | 6    | 7    |
| 1      | 3.49 | 1.96 | -.10 | -1.30    | -                      | .76* | .68* | .51* | .54* | .52* | .42* |
| 2      | 3.42 | 1.89 | -.16 | -1.08    | .76*                   | -    | .72* | .59* | .52* | .51* | .47* |
| 3      | 3.21 | 1.94 | -.04 | -1.19    | .68*                   | .72* | -    | .53* | .46* | .44* | .41* |
| 4      | 3.54 | 2.03 | -.29 | -1.21    | .51*                   | .59* | .53* | -    | .68* | .66* | .69* |
| 5      | 3.11 | 2.19 | .02  | -1.44    | .54*                   | .52* | .46* | .68* | -    | .90* | .61* |
| 6      | 3.07 | 2.14 | .08  | -1.37    | .52*                   | .51* | .44* | .66* | .90* | -    | .63* |
| 7      | 3.22 | 2.26 | -.10 | -1.47    | .42*                   | .47* | .41* | .69* | .61* | .63* | -    |

\*  $p < .05$

Item 1: Affirmations that you can complete your degree

Item 2: Affirmations that you belong in the institution

Item 3: Affirmations that you are a scientist

Item 4: Affirmations that people of your gender are important contributors to advancing knowledge

Item 5: Affirmations that people of your ethnicity are important contributors to advancing knowledge

Item 6: Affirmations that people of your culture are important contributors to advancing knowledge

Item 7: Affirmations that people of your sexual orientation are important contributors to advancing knowledge

Table S2

*Means, SD, Skew, and Interitem Correlations among the Items from the Micro Affirmations Scale for Historically Overrepresented Students in Study 1 (n = 281)*

| Item # | Mean | SD   | Skew | Kurtosis | Interitem Correlations |      |      |      |      |      |      |
|--------|------|------|------|----------|------------------------|------|------|------|------|------|------|
|        |      |      |      |          | 1                      | 2    | 3    | 4    | 5    | 6    | 7    |
| 1      | 3.71 | 1.90 | -.25 | -1.19    | -                      | .77* | .62* | .59* | .54* | .51* | .49* |
| 2      | 3.57 | 1.89 | -.24 | -1.16    | .77*                   | -    | .60* | .66* | .59* | .60* | .54* |
| 3      | 3.28 | 1.77 | .00  | -1.01    | .62*                   | .60* | -    | .54* | .42* | .46* | .52* |
| 4      | 3.66 | 1.99 | -.35 | -1.11    | .59*                   | .66* | .54* | -    | .83* | .78* | .82* |
| 5      | 3.53 | 2.10 | -.28 | -1.27    | .54*                   | .59* | .42* | .83* | -    | .89* | .75* |
| 6      | 3.42 | 2.10 | -.27 | -1.26    | .51*                   | .60* | .46* | .78* | .89* | -    | .77* |
| 7      | 3.45 | 2.16 | -.26 | -1.30    | .49*                   | .54* | .52* | .82* | .75* | .77* | -    |

\*  $p < .05$

Item 1: Affirmations that you can complete your degree

Item 2: Affirmations that you belong in the institution

Item 3: Affirmations that you are a scientist

Item 4: Affirmations that people of your gender are important contributors to advancing knowledge

Item 5: Affirmations that people of your ethnicity are important contributors to advancing knowledge

Item 6: Affirmations that people of your culture are important contributors to advancing knowledge

Item 7: Affirmations that people of your sexual orientation are important contributors to advancing knowledge

Table S3

*Results of the Mediation Models Examining Whether Scientific Self-Efficacy and Scientific Identity Mediated the Relation between Micro Affirmations and Intentions to Persist in Science-Related Career Pathways Among Historically Underrepresented and Historically Overrepresented Students*

|                          | Group Identity Micro Affirmations |         |         |         |                 | Indirect Effect      |
|--------------------------|-----------------------------------|---------|---------|---------|-----------------|----------------------|
|                          | c                                 | a       | b       | c'      | Indirect Effect |                      |
| Mediator (sample size)   | $\beta$                           | $\beta$ | $\beta$ | $\beta$ | $\beta$         | BC CI <sub>95%</sub> |
| Scientific Self-Efficacy |                                   |         |         |         |                 |                      |
| HU ( <i>n</i> = 38)      | .01                               | .23     | .29     | -.06    | .07             | [-.03, .29]          |
| HO ( <i>n</i> = 34)      | .23                               | .36*    | .48**   | .06     | .17             | [.02, .41]^          |
| Scientific Identity      |                                   |         |         |         |                 |                      |
| HU ( <i>n</i> = 39)      | .04                               | .38*    | .15     | -.02    | .06             | [-.06, .40]          |
| HO ( <i>n</i> = 34)      | .23                               | .18     | .66***  | .12     | .12             | [-.09, .32]          |
|                          | Individual Micro Affirmations     |         |         |         |                 | Indirect Effect      |
|                          | c                                 | a       | b       | c'      | Indirect Effect |                      |
| Mediator ( <i>n</i> )    | $\beta$                           | $\beta$ | $\beta$ | $\beta$ | $\beta$         | BC CI <sub>95%</sub> |
| Scientific Self-Efficacy |                                   |         |         |         |                 |                      |
| HU ( <i>n</i> = 39)      | .05                               | .36*    | .29     | -.06    | .11             | [-.02, .32]          |
| HO ( <i>n</i> = 34)      | .27                               | .49**   | .49*    | .03     | .24             | [.01, .45]^          |
| Scientific Identity      |                                   |         |         |         |                 |                      |
| HU ( <i>n</i> = 40)      | .08                               | .56***  | .14     | .01     | .08             | [-.12, .52]          |
| HO ( <i>n</i> = 34)      | .27                               | .37*    | .68***  | .02     | .25             | [.02, .49]^          |

*Note.* c = direct effect of micro affirmations on intentions to persist in science-related career pathways; a = effect of micro affirmations on the mediator; b = effect of the mediator on intentions to persist in science-related career pathways controlling for micro affirmations; c' = effect of micro affirmations on intentions to persist in science-related career pathways controlling for the mediator; BC CI<sub>95%</sub> = Bootstrapped bias-corrected 95% confidence interval for the standardized indirect effect.

In each case, the independent variable was micro affirmations at Time 1 and the dependent variable was intentions to persist in science-related career pathways at Time 3. All reported statistics are standardized.

\* *p* < .05, \*\* *p* < .01, \*\*\* *p* < .001, ^ Significantly different from 0.

Table S4

*The Micro Affirmations Scale (Omitting Item 5): Two-Factor Model Factor Loadings Observed from the Confirmatory Factor Analyses Conducted in Study 2*

| Micro Affirmations Scale Item                                                                             | Historically Underrepresented<br>( <i>n</i> = 106) |                        | Historically Overrepresented<br>( <i>n</i> = 127) |                        |
|-----------------------------------------------------------------------------------------------------------|----------------------------------------------------|------------------------|---------------------------------------------------|------------------------|
|                                                                                                           | Group Identity Affirmation                         | Individual Affirmation | Group Identity Affirmation                        | Individual Affirmation |
| #6: Affirmations that people of your culture are important contributors to advancing knowledge            | <b>.91</b>                                         | -                      | <b>.94</b>                                        | -                      |
| #7: Affirmations that people of your sexual orientation are important contributors to advancing knowledge | <b>.81</b>                                         | -                      | <b>.87</b>                                        | -                      |
| #4: Affirmations that people of your gender are important contributors to advancing knowledge             | <b>.66</b>                                         | -                      | <b>.77</b>                                        | -                      |
| #1: Affirmations that you can complete your degree                                                        | -                                                  | <b>.90</b>             | -                                                 | <b>.95</b>             |
| #2: Affirmations that you belong in the institution                                                       | -                                                  | <b>.86</b>             | -                                                 | <b>.82</b>             |
| #3: Affirmations that you are a scientist                                                                 | -                                                  | <b>.69</b>             | -                                                 | <b>.61</b>             |

*Note.* All loadings were significant at the  $p < .001$  level.

Table S5

*Zero-Order Correlations Among All Psychosocial Variables Across All Students in Study 2*

| Psychosocial Variable          | 1    | 2    | 3    | 4    | 5    | 6    | 7    | 8    | 9    | 10   | 11   | 12   | 13   | 14   | 15   |
|--------------------------------|------|------|------|------|------|------|------|------|------|------|------|------|------|------|------|
| 1. Group Identity MA (T1)      | -    | .56* | .16  | .36* | .32* | .61* | .38* | .24* | .30* | .25* | .35* | .35* | .19  | .17  | .14  |
| 2. Individual MA (T1)          | .56* | -    | .35* | .55* | .47* | .44* | .63* | .38* | .48* | .35* | .32* | .53* | .32* | .33* | .16  |
| 3. Science Self-Efficacy (T1)  | .16  | .35* | -    | .52* | .35* | .07  | .12  | .58* | .31* | .43* | .11  | .20  | .44* | .42* | .39* |
| 4. Science Identity (T1)       | .36* | .55* | .52* | -    | .62* | .34* | .40* | .52* | .60* | .40* | .30* | .39* | .55* | .60* | .42* |
| 5. Intent to Pursue (T1)       | .32* | .47* | .35* | .62* | -    | .25* | .33* | .42* | .51* | .52* | .12  | .29* | .40* | .46* | .53* |
| 6. Group Identity MA (T2)      | .61* | .44* | .07  | .34* | .25* | -    | .61* | .20  | .28* | .15  | .48* | .49* | .20  | .26* | .24* |
| 7. Individual MA (T2)          | .38* | .63* | .12  | .40* | .33* | .61* | -    | .42* | .41* | .30* | .43* | .67* | .27* | .36* | .27* |
| 8. Science Self-Efficacy (T2)  | .24* | .38* | .58* | .52* | .42* | .20  | .42* | -    | .55* | .64* | .22  | .26* | .46* | .53* | .38* |
| 9. Science Identity (T2)       | .30* | .48* | .31* | .60* | .51* | .28* | .41* | .55* | -    | .52* | .25* | .34* | .31* | .49* | .39* |
| 10. Intent to Pursue (T2)      | .25  | .35* | .43* | .40* | .52* | .15  | .30* | .64* | .52* | -    | .19  | .26* | .32* | .37* | .44* |
| 11. Group Identity MA (T3)     | .35* | .32* | .11  | .29* | .17  | .48* | .45* | .22  | .27* | .19  | -    | .73* | .25* | .30* | .23* |
| 12. Individual MA (T3)         | .35* | .53* | .20  | .39* | .29* | .49* | .67* | .26* | .34* | .26* | .72* | -    | .34* | .43* | .32* |
| 13. Science Self-Efficacy (T3) | .19  | .32* | .44* | .55* | .40* | .20  | .27* | .46* | .31* | .32* | .26* | .34* | -    | .56* | .50* |
| 14. Science Identity (T3)      | .17  | .33* | .42* | .60* | .46* | .26* | .36* | .53* | .49* | .37* | .31* | .43* | .56* | -    | .57* |
| 15. Intent to Pursue (T3)      | .14  | .16  | .39* | .42* | .53* | .24  | .27* | .38* | .39* | .44* | .23* | .32* | .50* | .57* | -    |

*Note.* MA = Micro affirmations; T1 = Time 1; T2 = Time 2; T3 = Time 3; Intent to Pursue = Intentions to pursue a science-related research career. These correlations pertain to all available data across the 3 time points. \*  $p < .05$



Table S6

*Zero-Order Correlations Among All Psychosocial Variables Across Historically Underrepresented Students in Study 2*

| Psychosocial Variable          | 1    | 2    | 3    | 4    | 5    | 6    | 7    | 8    | 9    | 10   | 11   | 12   | 13   | 14   | 15   |
|--------------------------------|------|------|------|------|------|------|------|------|------|------|------|------|------|------|------|
| 1. Group Identity MA (T1)      | -    | .76* | .14  | .45* | .43* | .66* | .46* | .21  | .38* | .34* | .45* | .40* | .27  | .20  | .04  |
| 2. Individual MA (T1)          | .76* | -    | .38* | .70* | .63* | .48* | .66* | .37* | .57* | .46* | .42* | .52* | .33* | .30  | .08  |
| 3. Science Self-Efficacy (T1)  | .14  | .38* | -    | .64* | .34* | .15  | .14  | .72* | .31* | .56* | .20  | .18  | .52* | .43* | .34* |
| 4. Science Identity (T1)       | .45* | .70* | .64* | -    | .51* | .40* | .47* | .55* | .57* | .58* | .52* | .53* | .51* | .57* | .41* |
| 5. Intent to Pursue (T1)       | .43* | .63* | .34* | .51* | -    | .35* | .38* | .37* | .33* | .60* | .34* | .42* | .35* | .28  | .43* |
| 6. Group Identity MA (T2)      | .66* | .48* | .15  | .40* | .35* | -    | .58* | .13  | .35* | .21  | .62* | .61* | .33* | .37* | .40* |
| 7. Individual MA (T2)          | .46* | .66* | .14  | .47* | .38* | .58* | -    | .31  | .44* | .35* | .49* | .64* | .22  | .30  | .28  |
| 8. Science Self-Efficacy (T2)  | .21  | .37* | .72* | .55* | .37* | .13  | .31  | -    | .39* | .78* | .17  | .13  | .45* | .44* | .27  |
| 9. Science Identity (T2)       | .38* | .57* | .31* | .57* | .33* | .35* | .44* | .39* | -    | .51* | .31  | .33* | .20  | .28  | .14  |
| 10. Intent to Pursue (T2)      | .34* | .46* | .56* | .58* | .60* | .21  | .35* | .78* | .51* | -    | .29  | .24  | .29  | .30  | .36* |
| 11. Group Identity MA (T3)     | .45* | .42* | .20  | .52* | .34* | .62* | .49* | .17  | .31  | .29  | -    | .76* | .28  | .32* | .28  |
| 12. Individual MA (T3)         | .40* | .52* | .18  | .53* | .42* | .61* | .64* | .13  | .33* | .24  | .76* | -    | .33* | .36* | .27  |
| 13. Science Self-Efficacy (T3) | .27  | .33* | .52* | .51* | .35* | .33* | .22  | .45* | .20  | .29  | .28  | .33* | -    | .53* | .59* |
| 14. Science Identity (T3)      | .20  | .30  | .43* | .57* | .28  | .37* | .30  | .44* | .28  | .30  | .32* | .36* | .53* | -    | .41* |
| 15. Intent to Pursue (T3)      | .04  | .08  | .34* | .41* | .43* | .40* | .28  | .27  | .14  | .36* | .28  | .27  | .59* | .41* | -    |

*Note.* MA = Micro affirmations; T1 = Time 1; T2 = Time 2; T3 = Time 3; Intent to Pursue = Intentions to pursue a science-related research career. These correlations pertain to all available data across the 3 time points. \*  $p < .05$

Table S7

*Zero-Order Correlations Among All Psychosocial Variables Across Historically Overrepresented Students in Study 2*

| Psychosocial Variable          | 1    | 2    | 3    | 4    | 5    | 6    | 7    | 8    | 9    | 10   | 11   | 12   | 13   | 14   | 15   |
|--------------------------------|------|------|------|------|------|------|------|------|------|------|------|------|------|------|------|
| 1. Group Identity MA (T1)      | -    | .18  | .26  | .29  | .23  | .47* | .26  | .36* | .18  | .27  | .23  | .33  | .24  | .18  | .23  |
| 2. Individual MA (T1)          | .18  | -    | .42* | .45* | .36* | .33  | .62* | .49* | .37* | .19  | .12  | .57* | .46* | .42* | .27  |
| 3. Science Self-Efficacy (T1)  | .26  | .42* | -    | .38* | .26  | .02  | .11  | .33  | .32  | .18  | .13  | .34  | .31  | .37* | .49* |
| 4. Science Identity (T1)       | .29  | .45* | .38* | -    | .70* | .31  | .38* | .51* | .68* | .25  | .20  | .38* | .72* | .64* | .44* |
| 5. Intent to Pursue (T1)       | .23  | .36* | .26  | .70* | -    | .18  | .32  | .44* | .77* | .47* | .03  | .31  | .56* | .64* | .63* |
| 6. Group Identity MA (T2)      | .47* | .33  | .02  | .31  | .18  | -    | .64* | .36* | .20  | .22  | .30  | .39* | .20  | .19  | .03  |
| 7. Individual MA (T2)          | .26  | .62* | .11  | .38* | .32  | .64* | -    | .57* | .36* | .24  | .34  | .76* | .44* | .46* | .24  |
| 8. Science Self-Efficacy (T2)  | .36* | .49* | .33  | .51* | .44* | .36* | .57* | -    | .78* | .49* | .41* | .52* | .47* | .62* | .51* |
| 9. Science Identity (T2)       | .18  | .37* | .32  | .68* | .77* | .20  | .36* | .78* | -    | .59* | .20  | .41* | .57* | .78* | .69* |
| 10. Intent to Pursue (T2)      | .27  | .19  | .18  | .25  | .47* | .22  | .24  | .49* | .59* | -    | .00  | .23  | .30  | .49* | .62* |
| 11. Group Identity MA (T3)     | .23  | .12  | .13  | .20  | .03  | .30  | .34  | .41* | .20  | .00  | -    | .63* | .37* | .39* | .18  |
| 12. Individual MA (T3)         | .33  | .57* | .34  | .38* | .31  | .39* | .76* | .52* | .41* | .23  | .63* | -    | .52* | .60* | .42* |
| 13. Science Self-Efficacy (T3) | .24  | .46* | .31  | .72* | .56* | .20  | .44* | .47* | .57* | .30  | .37* | .52* | -    | .64* | .55* |
| 14. Science Identity (T3)      | .18  | .42* | .37* | .64* | .64* | .19  | .46* | .62* | .78* | .49* | .39* | .60* | .64* | -    | .73* |
| 15. Intent to Pursue (T3)      | .23  | .27  | .49* | .44* | .63* | .03  | .24  | .51* | .69* | .62* | .18  | .42* | .55* | .73* | -    |

*Note.* MA = Micro affirmations; T1 = Time 1; T2 = Time 2; T3 = Time 3; Intent to Pursue = Intentions to pursue a science-related research career. These correlations pertain to all available data across the 3 time points. \*  $p < .05$
